# Supplementary material for: Alteration of Autophagy and Glial Activity in Nilotinib-Treated Huntington’s Disease Patients
Source: MDPI journal article supplement (doi:10.3390/metabo12121225), 2022-12-06
Supplement: s1 [file s1]

# Immunity

Nilotinib: baseline  
vs. 3 months

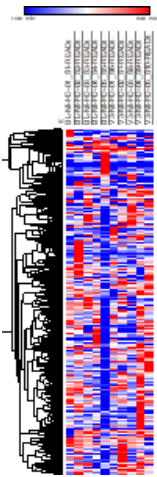

## Significantly Altered miRNAs

|                  |                   |                  |
|------------------|-------------------|------------------|
| hsa-miR-1-3p     | hsa-miR-937-5p    | hsa-miR-1233-5p  |
| hsa-miR-144-5p   | hsa-miR-6886-3p   | hsa-miR-3188     |
| hsa-miR-133a-3p  | hsa-miR-4674      | hsa-miR-766-5p   |
| hsa-miR-1275     | hsa-miR-326       | hsa-miR-3677-5p  |
| hsa-miR-5190     | hsa-miR-1909-3p   | hsa-miR-4634     |
| hsa-miR-4655-5p  | hsa-miR-3616-3p   | hsa-miR-1307-5p  |
| hsa-miR-5692c    | hsa-miR-6794-5p   | hsa-miR-203a-3p  |
| hsa-miR-6893-3p  | hsa-miR-1272      | hsa-miR-4531     |
| hsa-miR-4267     | hsa-miR-200b-5p   | hsa-miR-6813-5p  |
| hsa-miR-4732-5p  | hsa-miR-374b-5p   | hsa-miR-496      |
| hsa-miR-4262     | hsa-miR-125b-2-3p | hsa-miR-487a-5p  |
| hsa-miR-1301-3p  | hsa-miR-6797-3p   | hsa-miR-3605-3p  |
| hsa-miR-4646-5p  | hsa-miR-939-5p    |                  |
| hsa-miR-5481     | hsa-miR-3973      | hsa-miR-4791     |
| hsa-miR-4322     | hsa-miR-548a-5p   | hsa-miR-489-3p   |
| hsa-miR-5089-3p  | hsa-miR-19a-5p    | hsa-miR-181b-3p  |
| hsa-miR-153-5p   | hsa-miR-302c-3p   | hsa-miR-3064-3p  |
| hsa-miR-95-5p    | hsa-miR-378b      | hsa-miR-644a     |
| hsa-miR-3189-3p  | hsa-miR-4653-3p   | hsa-miR-892c-5p  |
| hsa-miR-6829-3p  | hsa-miR-6796-5p   | hsa-miR-3118     |
| hsa-miR-7153-3p  | hsa-miR-920       | hsa-miR-4252     |
| hsa-miR-6773-5p  | hsa-miR-4693-3p   | hsa-miR-3134     |
| hsa-miR-186-3p   | hsa-miR-7976      | hsa-miR-3934-3p  |
| hsa-miR-3675-3p  | hsa-miR-2115-3p   | hsa-miR-3975     |
| hsa-miR-454-5p   | hsa-miR-656-3p    | hsa-miR-4433b-3p |
| hsa-miR-5187-3p  | hsa-miR-651-3p    | hsa-miR-6818-3p  |
| hsa-miR-519d-5p  | hsa-miR-219b-5p   | hsa-miR-8058     |
| hsa-miR-892b     | hsa-miR-4639-5p   | hsa-miR-3925-3p  |
| hsa-miR-34b-3p   | hsa-miR-6840-3p   | hsa-miR-4797-3p  |
| hsa-miR-6715b-3p | hsa-miR-4638-5p   | hsa-miR-3137     |
| hsa-miR-1199-3p  | hsa-miR-1243      |                  |
| hsa-miR-6839-3p  | hsa-miR-3674      |                  |

inhibited

disinhibited

|          |         |               |          |         |             |          |          |           |
|----------|---------|---------------|----------|---------|-------------|----------|----------|-----------|
| ABL1     | CACNG3  | COL1A2        | FZD10    | IFNA4   | KHDC1       | MEF2D    | PLEKHA2  | RPS6KA3   |
| ACTB     | CACNG7  | COL5A3        | FZD2     | IFNA6   | KLK10       | MMP1     | PLEKHA3  | RPS6KB1   |
| ACTR3    | CALM1   | CREB1         | FZD9     | IFNAR1  | KLK12       | MMP1     | PLEKHA4  | RPS6KB1   |
| ADAMTS4  | CALM5   | CREB3         | FZD9     | IFNLR1  | KLK15       | MMP1     | PLEKHA4  | RPS6KB1   |
| AHR      | CANX2G  | CREB3L1       | GNAI2    | IKBKG   | KLK2        | NCK1     | PPP1R14B | RSK2      |
| AKT2     | CANX4   | CREB3L4       | GNAI2    | IL10    | KLK4        | NECTIN2  | PPP2C8   | SIRPB1    |
| ALOX12   | CASP10  | CRK           | GNAQ     | IL10RA  | KLK5        | NFYAT2   | PPP2R3A  | SFRP1     |
| AP1G1    | COL2    | CSF1          | GNAI1    | IL17F   | KLK9        | NFYAT2   | PPP2R3B  | SFRP5     |
| AP1G2    | CCR1    | CSF3          | GNG13    | IL18    | KLRL1       | NGF      | PPP2R3B  | SH2B3     |
| AP1G2    | CCR4    | CSNK1D        | GNG2     | IL1R1   | KLRC2       | NLK      | PPP2R3D  | SIRPB1    |
| AP2M1    | CCR5    | CSNK1G1       | GNG3     | IL1RL1  | KLRC4-KLRK1 | NOS2     | PRKCA    | SMAAD3    |
| AP2C     | CCR8    | CXCL12        | HAVCR2   | IL1RL2  | KLRD1       | NOTCH2   | PRKCD    | SMO       |
| APOC1    | CD18    | DOX5B         | HLAA     | IL2     | KRAS        | NOTCH3   | PRKCE    | SOC22     |
| APOC2    | CD209   | DEFB132       | HLAC     | IL22    | LCN2        | NOTCH4   | PSEN1    | SOC33     |
| APOC4    | CD3E    | DEFB          | HLA-DQB  | IL24    | LIMK1       | OSM      | PSENEN   | SOSL      |
| APOD     | CD4     | DKK3          | HLA-DQB1 | IL25    | LIMK2       | PAK1     | PTFA     | SPR1      |
| APOL1    | CD81    | DOX1          | HLA-DQB5 | IL27RA  | LTBR        | PAK2     | PVN      | SRC       |
| APPC3    | CD86    | ELK1          | HLAF     | IL2RA   | LYVE1       | PAK3     | RAB11B   | STAT1     |
| ATF3     | CD8B    | F2RL1         | HRAS     | IL2RB   | MMPR        | PAK4     | MAC2     | STAT2     |
| ATF7     | Cdc42   | FADD          | HSP90B1  | IL32    | MAP2K7      | PDGF1B   | RAP2B    | STAT3A    |
| BHL2     | CEBPB   | FOS           | ICOS     | IL4     | MAP3K13     | PIK3R6   | RASD2    | TCTF12    |
| CSAR1    | CFL1    | FOXO3         | IFIT2    | IL5     | MAP3K8      | PLA2G2D  | RHOA     | TGFB3     |
| CANAL5   | CLTC    | FOXQ3         | IFNA1    | IL9R    | MAP3K9      | PLA2G6   | RHOE     | TGFB3     |
| CANAL203 | CLU     | FSCN1         | IFNA17   | IRS4    | MAPK3       | PLCD3    | RHOE     | TLN1      |
| CANR2    | COL11A2 | FN1           | IFNA2    | ITGAL   | MAPKAPK2    | PLCH2    | RHOE     | TLN1      |
| CANR3    | COL1A1  | FZD1          | IFNA21   | JMD16   | MAVS        | PLD1     | RHOE     | TLN1      |
| ACTG1    | CASP8   | DAPP1         | GNAI3    | IL13    | KIR2DL4     | PONA     | PPP3R1   | SOC54     |
| ACTR3    | CASP9   | DEFB118       | GNAI2    | IL17A   | KIR3DL1     | PCYOX1   | PPP3R2   | SOST      |
| ACTR3    | CCL5    | DEFB123       | GNAI5    | IL18    | KIR3DL3     | PCYOX1   | PPP3R2   | SOST      |
| ADRB1B   | CND1    | DEFB44/DEFB48 | GNAI5    | IL18R1  | KLK7        | PDPR1    | PRKCG    | TBX21     |
| AIFM1    | CCR7    | DGKB          | GNG10    | IL1A    | KLK8        | PIK3CD   | PRKCG    | TCF4      |
| AP1S1    | CD138   | DHX58         | GNG11    | IL1RAP  | LAR1        | PIK3CG   | PRKCG    | TGFB2     |
| APOM     | CD226   | DRAG3         | GNG12    | IL20    | LEP         | PIK3R5   | PRKCG    | TGFB2     |
| APR6     | CD244   | DKK1          | GNG5     | IL23R   | LGAL5       | PLA2G12B | PSEN2    | TNFRSF138 |
| ARG1     | CD247   | DKK2          | GZMB     | IL26    | MAF         | PLA2G2A  | PTEN     | TNFRSF13C |
| APPC1A   | CD36    | DLL4          | HIST1    | IL27    | MAP2K3      | PLA2G2E  | PTGDR2   | TNFRSF10  |
| APPC4    | CD40LG  | DEFB2K2       | HLA-B    | IL2RA   | MAP3K2      | PLA2G2F  | PTPRN2   | TNFRSF11  |
| B2M      | CD69    | FAS           | HLA-DMB  | IL3     | MAP3K6      | PLA2G4D  | RAB7A    | TNFRSF9   |
| BCL1D    | CD74    | FASLG         | HLA-DQB1 | IL31    | MAPK1       | PLA2G4F  | RAP1B    | TGFB3     |
| BCL2L1   | CFL2    | FCER1G        | HLA-C    | IL33    | MAPK13      | PLCE1    | RAP2A    | TGFB3     |
| BLNK     | CHP1    | FCGR1A        | HNF1A    | IL4R    | MICA        | PLD3     | RASD2    | TNFRSF5   |
| CANB1    | CHTA    | FCGR2A        | HSP41A   | IL6ST   | MIRAS       | PON1     | RASD5    | TNFRSF5   |
| CANAL1A  | CLTA    | FCGR3A/FCGR3B | HSP90    | IL7R    | MIR         | POU2F1   | RELA     | ULBP1     |
| CANAL1E  | COL3A1  | FBNP1         | IFH1     | IRAK3   | NCF2        | PPP1CA   | RHOE     | VCAM1     |
| CANAL1   | CSNK1E  | FZD2          | IFNA2    | IRAK4   | NCK2        | PPP1CB   | RHOE     | VCAM1     |
| CANAL2D1 | CTL4    | FZD3          | IFNGR1   | IRF7    | NF1L3       | PPP1R34C | RASD2    | WIF1      |
| CANR4    | CXCL1   | GAB2          | IFN      | IRF9    | NFYAT2      | PPP1R3D  | SIRPB1   | WNT10B    |
| CANR2    | CXCL10  | GFI1          | IFNLR1   | ITGB1   | NOTUM       | PPP1R7   | SFRP2    | WNT11     |
| CANR8    | CXCL8   | GNAI3         | IFNW1    | ITGB2   | NRAS        | PPP2R1B  | SH2B3    | WNT2B     |
| CASP6    | CXCR6   | GNAI4         | IKBK     | ITPR1   | OSMR        | PPP2R2A  | SH2D1A   | WNT7B     |
| CASP7    | CYC5    | GNAI5         | IL10RB   | KIR2DL1 | PAMP4       | PPP2R3A  | SIGLEC7  |           |

## Pathways

- T lymphocyte-mediated apoptosis
- Cytokine Production and Signaling
- PI3K Signaling in B lymphocytes
- T & B Cell Receptor Signaling
- CD28 Signaling in T helper cells
- Crosstalk between Dendritic Cells and Natural Killer Cells
- MIF regulation of Innate Immunity
- NFkB Signaling
- Th1 and Th2 Activation

**Figure S1.** miRNAs targeting genes associated with innate and adaptive immunity are altered following nilotinib treatment. Gene ontology analysis revealed 38 upregulated and 55 downregulated miRNAs that target 476 genes experimentally observed to be associated with immunological processes, including B and T cell receptor signaling, inflammatory cytokine production, and innate immune cell crosstalk.

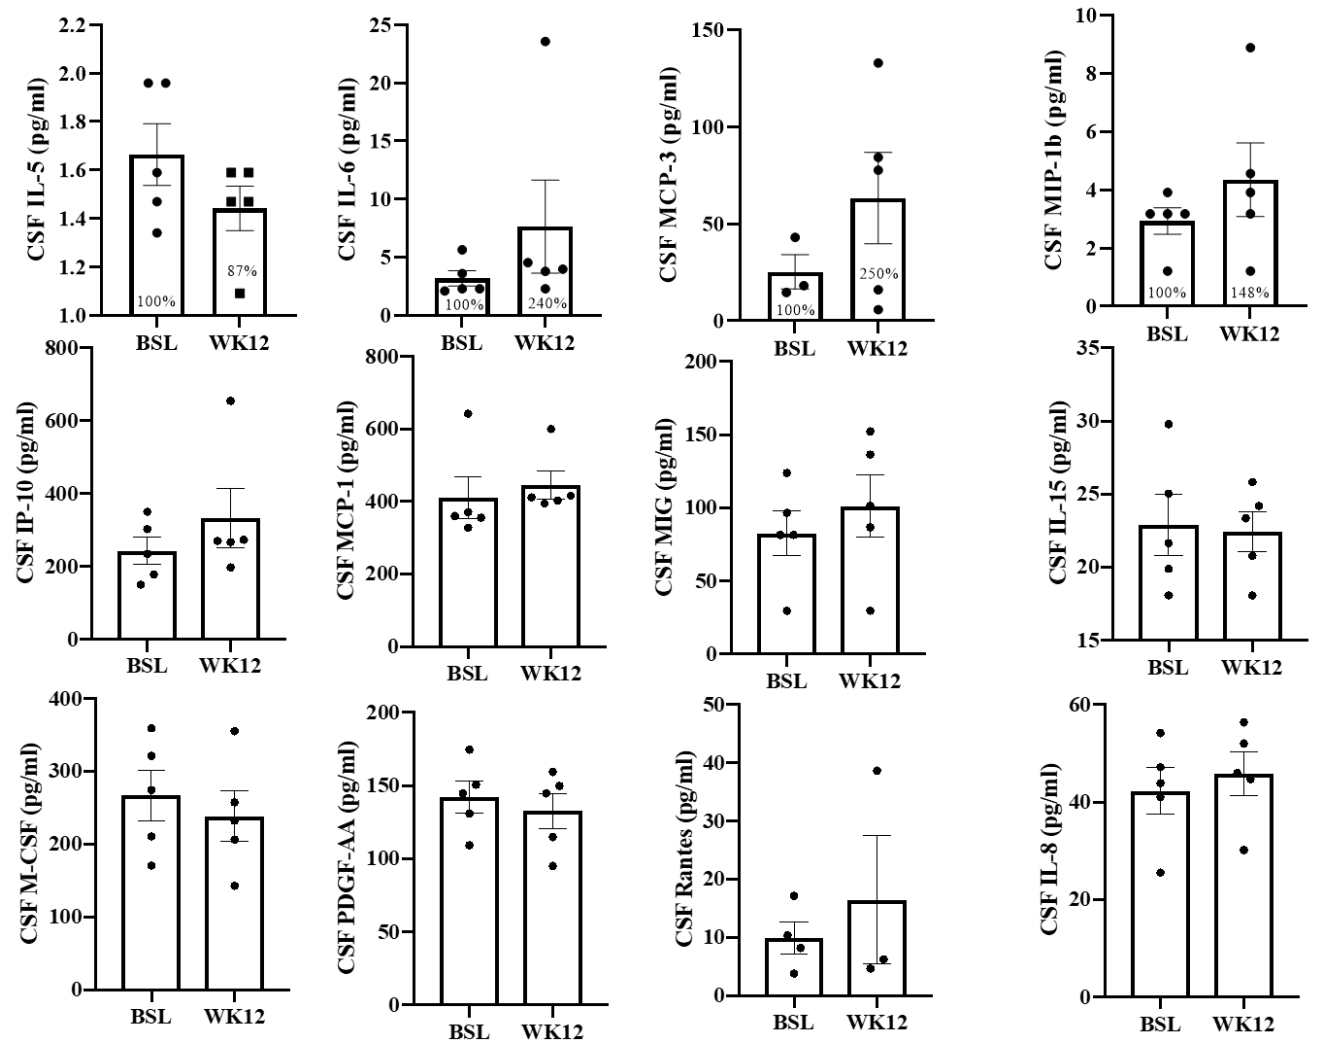

**Figure S2.** ELISA concentrations inflammatory markers in the CSF following nilotinib treatment.

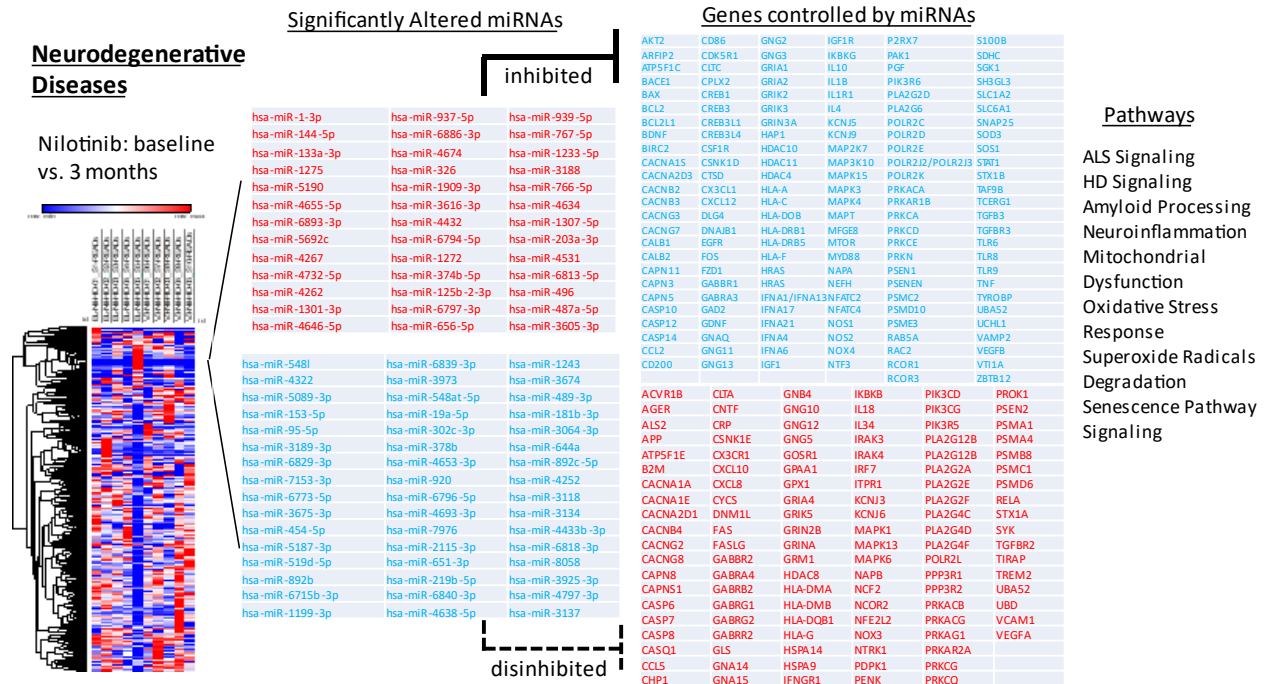

**Figure S3.** miRNAs targeting genes associated with various neurodegenerative disorders are altered following nilotinib treatment. Gene ontology analysis revealed 39 upregulated and 48 downregulated miRNAs that target 268 genes experimentally observed to be associated with neurodegenerative diseases including AD, PD, ALS, and HD.

Table S1. Demographics and Adverse Events.

| Patient ID                             | Nil-HD-001             | Nil-HD-002                          | Nil-HD-003             | Nil-HD-004                                                                         | Nil-HD-005             | Nil-HD-006                             | Mean +/- SD                     |              |
|----------------------------------------|------------------------|-------------------------------------|------------------------|------------------------------------------------------------------------------------|------------------------|----------------------------------------|---------------------------------|--------------|
| Age                                    | 62                     | 47                                  | 61                     | 63                                                                                 | 58                     | 50                                     | 56.83 ± 6.74                    |              |
| Gender                                 | M                      | F                                   | M                      | F                                                                                  | M                      | M                                      |                                 |              |
| Weight (kg)                            | 84.1                   | 58.7                                | 65.3                   | 82.9                                                                               | 82.13                  | 97.1                                   | 78.37 ± 13.97                   |              |
| Height (cm)                            | 177.3                  | 171.8                               | 178                    | 158.9                                                                              | 178.2                  | 176                                    | 172.58 ± 8.07                   |              |
| BMI                                    | 26.8                   | 19.89                               | 20.61                  | 32.83                                                                              | 25.86                  | 31.35                                  | 26.11 ± 5.95                    |              |
| Race                                   | White                  | White                               | White                  | White                                                                              | White                  | White                                  |                                 |              |
| Ethnicity                              | Not Hispanic or Latino | Hispanic or Latino                  | Not Hispanic or Latino | Not Hispanic or Latino                                                             | Not Hispanic or Latino | Not Hispanic or Latino                 |                                 |              |
| Selective serotonin reuptake inhibitor | Zoloft (Sertraline)    | -                                   | -                      | -                                                                                  | -                      | Prozac (Fluoxetine)                    |                                 |              |
|                                        | No. AEs (%)            | No. AEs (%)                         | No. AEs (%)            | No. AEs (%)                                                                        | No. AEs (%)            | No. AEs (%)                            | Total No. of Adverse Events (%) |              |
| Psychiatric Disorders                  | Irritability 1 (5.2%)  |                                     |                        |                                                                                    |                        | Obsessive compulsive disorder 1 (5.2%) | 2 (10.5%)                       |              |
| Nervous System Disorders               | Headache 1 (5.2%)      | Headache 1 (5.2%)                   |                        | Headache 1 (5.2%)                                                                  |                        |                                        | 3 (15.8%)                       |              |
| Skin Disorders                         | Folliculitis 2 (10.5%) |                                     |                        |                                                                                    |                        |                                        | 2 (10.5%)                       |              |
| Digestive System Disorders             |                        | Stomach pain 1 (5.2%)               |                        |                                                                                    |                        |                                        | 1 (2.5%)                        |              |
| Respiratory Tract Disorders            |                        | Sinus 1 (5.2%)<br>Runny nose (5.2%) | Flu 1 (5.2%)           | Flu 1 (5.2%)                                                                       |                        |                                        | 4 (21%)                         |              |
| General Disorders                      |                        |                                     | Fatigue 1 (5.2%)       | Cold sore 1 (5.2%)<br>Dry skin 2 (10.5%)<br>Fatigue 1 (5.2%)<br>Allergies 1 (5.2%) |                        | Motion sickness 1 (5.2%)               | 7 (36.84%)                      |              |
| No. of AEs per patient (%)             | 4 (21%)                | 4 (21%)                             | 2 (10.5%)              | 7 (36.84%)                                                                         | 0 (0%)                 | 2 (10.5%)                              | 19 (100%)                       |              |
| EKG QTc interval (ms)                  |                        |                                     |                        |                                                                                    |                        |                                        |                                 |              |
| Patient ID                             | Screening              | Baseline                            | 0.5 Month              | 1 Month                                                                            | 1.5 Month              | 2 Month                                | 3 Month                         | 4 Month      |
| Nil-HD-001                             | 440                    | 426                                 | 438                    | 417                                                                                | 435                    | 427                                    | 424                             | 415          |
| Nil-HD-002                             | 459                    | 433                                 | 426                    | 432                                                                                | 447                    | 438                                    | 442                             | Remote visit |
| Nil-HD-003                             | 389                    | 400                                 | 400                    | 410                                                                                | Remote visit           | Remote visit                           | 416                             | 403          |
| Nil-HD-004                             | 414                    | 425                                 | 413                    | Remote visit                                                                       | Remote visit           | Remote visit                           | 431                             | 428          |
| Nil-HD-005                             | 422                    | 423                                 | 425                    | 417                                                                                | 426                    | 416                                    | 418                             | 422          |
| Nil-HD-006                             | 403                    | 402                                 | 407                    | 384                                                                                | 408                    | 410                                    | 408                             | 388          |

Table S2. Exploratory Clinical Outcomes.

|                            | Baseline<br>(Mean ± SD) | 3 Mths<br>(Mean ± SD) | 4 Mths<br>(Mean ± SD) | BSL Vs 3 Mths<br>(p value) | 3 Mths Vs 4 Mths<br>(p value) |
|----------------------------|-------------------------|-----------------------|-----------------------|----------------------------|-------------------------------|
| MOCA                       | 26.50 ± 2.74            | 25.83 ± 3.0           | 28.4 ± 1.14           | 0.25                       | 0.1563                        |
| Timed up and go            | 10.05 ± 2.0             | 12.02 ± 2.38          | 10.25 ± 1.64          | 0.1563                     | 0.0781                        |
| TMT-B                      | 120.2 ± 79.15           | 120 ± 74.69           | 116.2 ± 72.44         | 0.5                        | 0.5                           |
| UHDRS-m (motor score)      | 28 ± 13.89              | 27.33 ± 13.63         | 28.33 ± 10.88         | 0.375                      | 0.125                         |
| Apathy (Partner)           | 21.5 ± 4.37             | 23 ± 5.1              | 21.83 ± 4.79          | 0.125                      | 0.4531                        |
| Apathy (Participant)       | 23 ± 3.69               | 26.17 ± 2.32          | 24.17 ± 2.4           | 0.1875                     | 0.125                         |
| Irritability (Partner)     | 14.17 ± 4.79            | 15.83 ± 4.22          | 17.17 ± 4.12          | 0.3125                     | 0.3281                        |
| Irritability (Participant) | 15.17 ± 8.04            | 17 ± 9.14             | 19 ± 6.03             | 0.375                      | 0.4063                        |
